# Supplementary material for: Simulations of 7 Be and 10 Be with the GEOS-Chem global model v14.0.2 using state-of-the-art production rates
Source: Copernicus journal article supplement (doi:10.5194/gmd-16-7037-2023), 2023-12-04
Supplement: Supplementary file 1 [file gmd-16-7037-2023-supplement.zip]

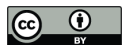

*Supplement of*

## **Simulations of $^7\text{Be}$ and $^{10}\text{Be}$ with the GEOS-Chem global model v14.0.2 using state-of-the-art production rates**

**Minjie Zheng et al.**

*Correspondence to:* Minjie Zheng (minjie.zheng@env.ethz.ch) and Nønne L. Prisle (nonne.prisle@oulu.fi)

- gmd-16-7037-2023-supplement-title-page.pdf
- TableS1\_S4.xlsx
- supplementary\_gmd-2023-111-R2.pdf

The copyright of individual parts of the supplement might differ from the article licence.
