# Supplementary material for: Simulations of 7 Be and 10 Be with the GEOS-Chem global model v14.0.2 using state-of-the-art production rates
Source: Copernicus journal article supplement (doi:10.5194/gmd-16-7037-2023), 2023-12-04
Supplement: Supplementary file 2 [file gmd-16-7037-2023-supplement.zip]

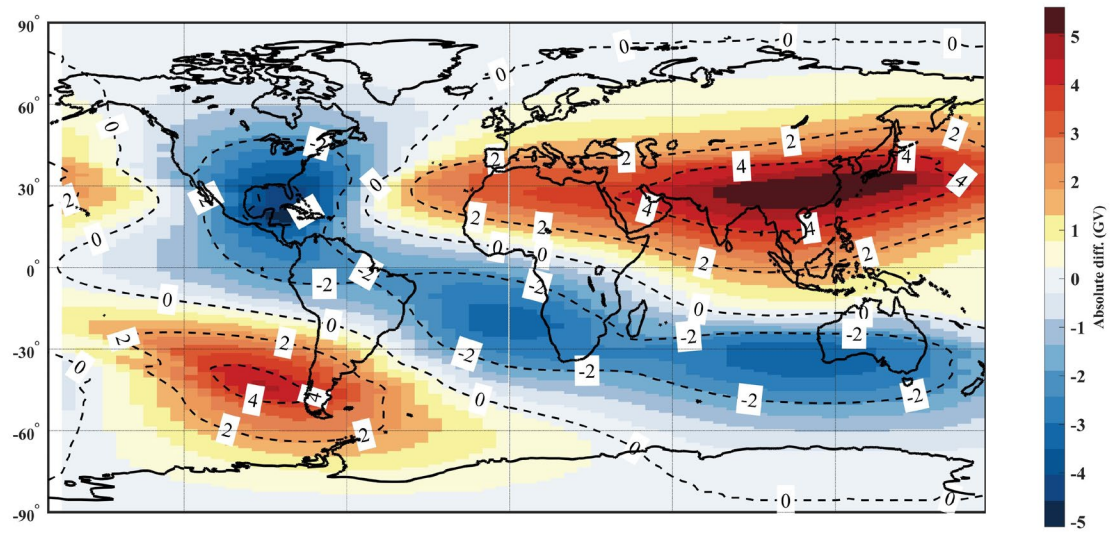

**Figure S1.** Differences between cut-off rigidity from Copeland (2018) and cut-off rigidity using the Stoermer approximation.

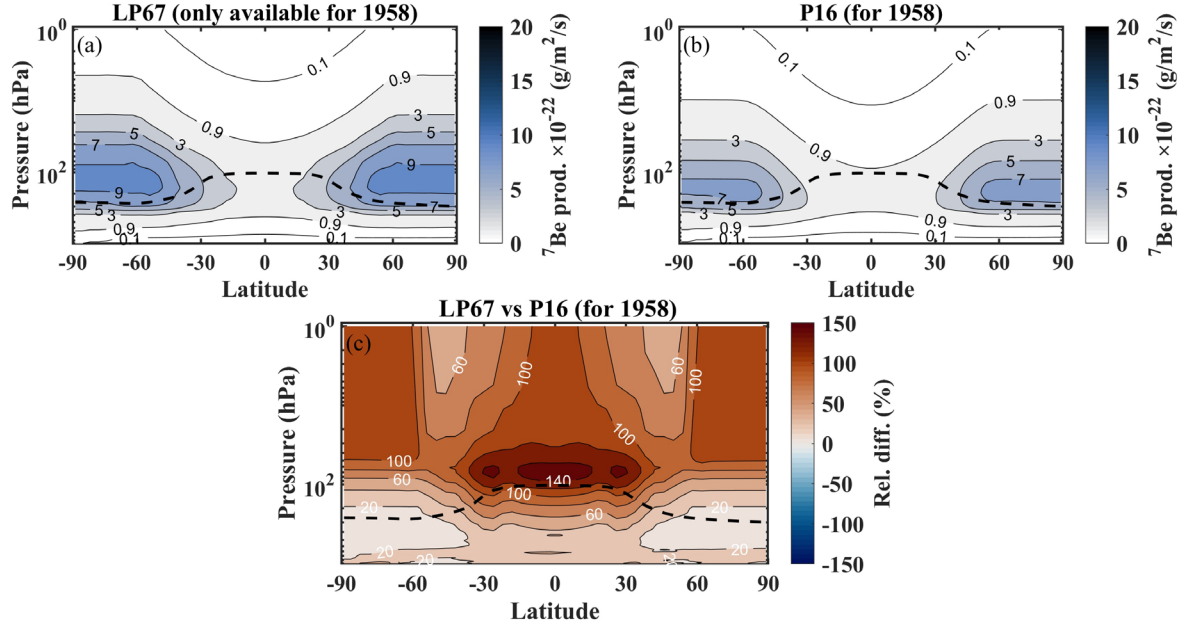

**Figure S2.**  $^7\text{Be}$  production rates of (a) LP67 for the year 1958, (b) P16 for the year 1958, and (c) relative differences (%) between LP67 and P16 production rates for the year 1958, i.e.,  $(^7\text{Be}_{\text{LP67}} - ^7\text{Be}_{\text{P16}}) / ^7\text{Be}_{\text{P16}} \times 100\%$ . The dashed line indicates the location of MERRA-2 thermal tropopause.

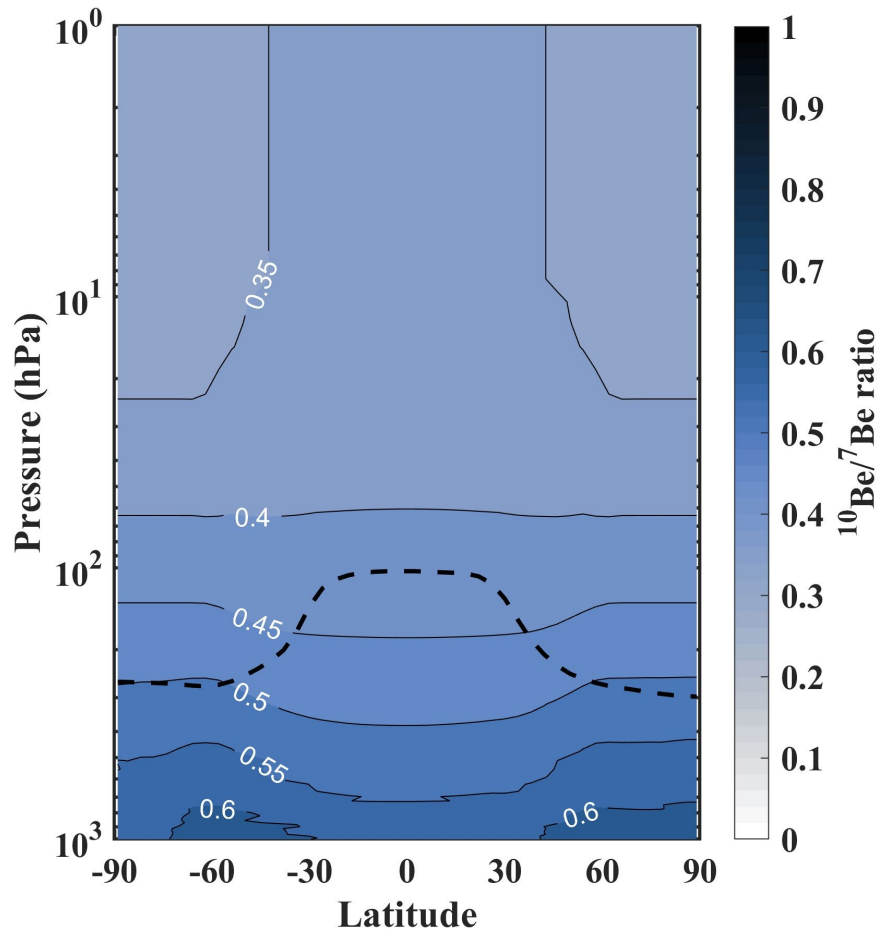

**Figure S3.** Vertical distribution of the  $^{10}\text{Be}/^7\text{Be}$  production ratios derived from the P16 production model. The black dash line indicates the location of MERRA-2 thermal tropopause.

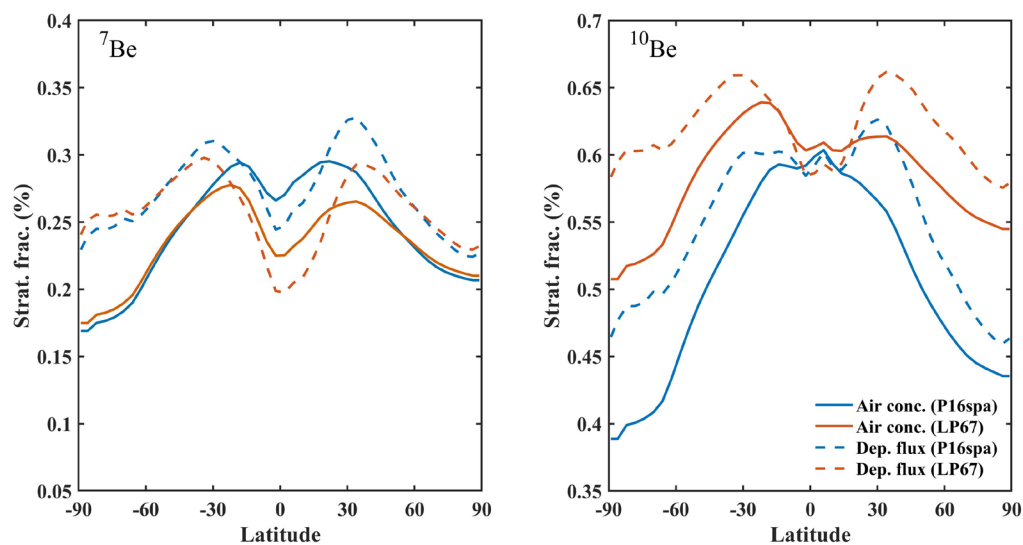

**Figure S4.** Stratospheric fraction of annual zonal mean surface air concentrations (solid lines) and total deposition fluxes (dashed lines) in the model simulations as a function of latitude for  $^7\text{Be}$  (left panel) and  $^{10}\text{Be}$  (right panel).

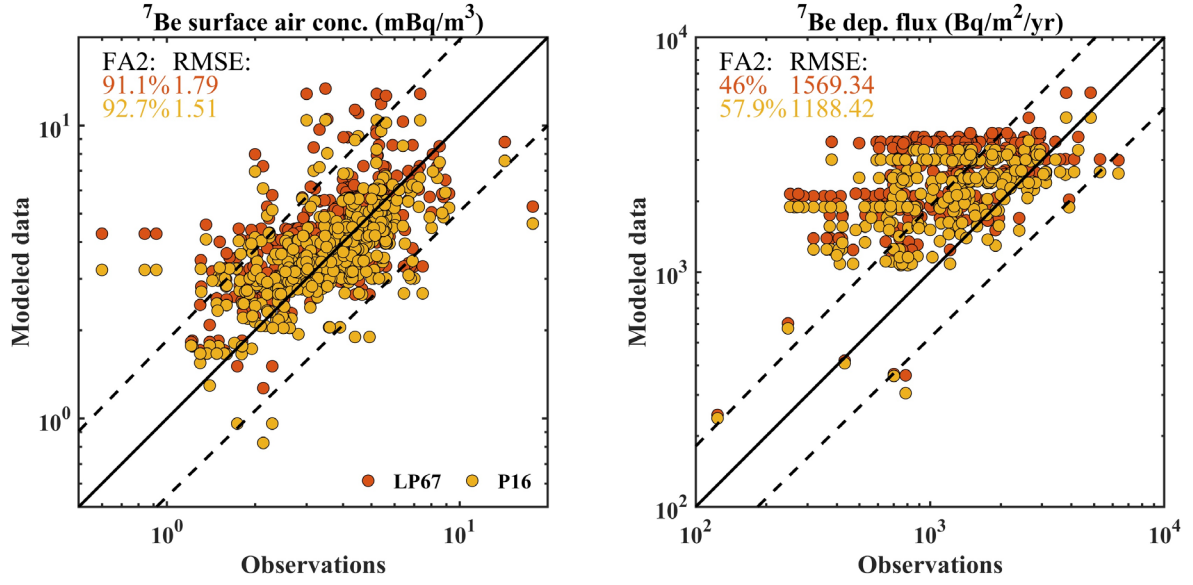

**Figure S5.** Scatter plot of modeled  $^7\text{Be}_{\text{LP67}}$  (red color) and  $^7\text{Be}_{\text{P16}}$  (orange color) versus observed  $^7\text{Be}$  surface air concentrations (left panel) and deposition fluxes (right panel). The dashed lines are the factor of 2 of 1:1 line (straight lines). Noted that  $^7\text{Be}_{\text{LP67}}$  is multiplied with a scale factor (1.39) to correct the solar modulation influence following previous studies (e.g., Koch et al., 1996; Liu et al., 2016)

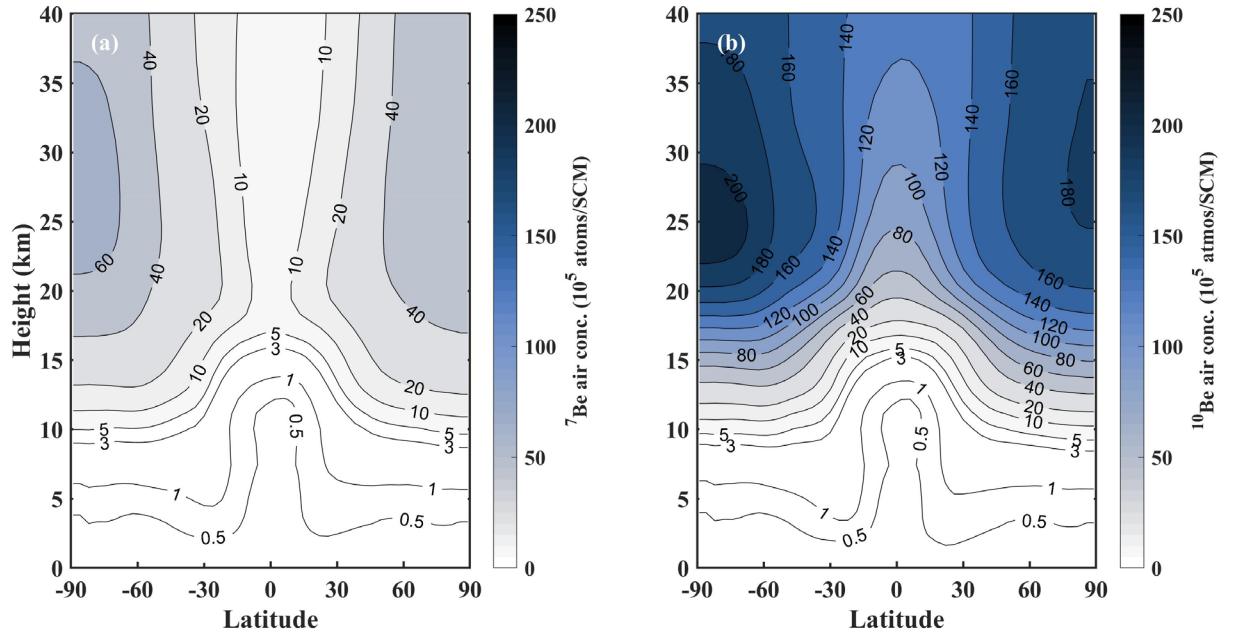

**Figure S6.** Latitude-height cross-sections of model zonal mean (a)  $^7\text{Be}_{\text{P16spa}}$  and (b)  $^{10}\text{Be}_{\text{P16spa}}$  ( $\times 10^5$  atoms/SCM) over the period 2008-2018.

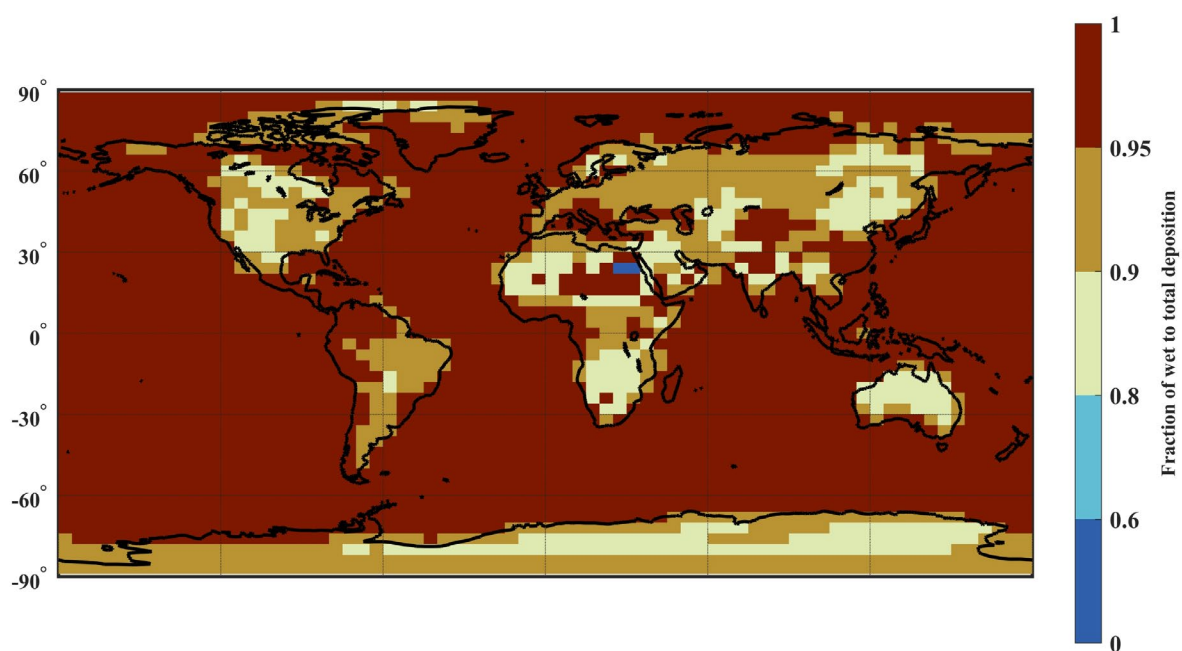

**Figure S7.** Fractions of wet to total deposition fluxes of  $^{10}\text{BeP16spa}$  modeled by GEOS-Chem averaged over the period 2008-2018. Noted that this fraction is also similar for modeled  $^7\text{BeP16spa}$ .
