# Supplementary material for: Simulations of 7 Be and 10 Be with the GEOS-Chem global model v14.0.2 using state-of-the-art production rates
Source: Copernicus journal article supplement (doi:10.5194/gmd-16-7037-2023), 2023-12-04
Supplement: Supplementary file 3 [file gmd-16-7037-2023-supplement.zip]

Archive with 3 entries (3 files):
- supplementary_gmd-2023-111-R2.pdf
- TableS1_S4.xlsx
- gmd-16-7037-2023-supplement-title-page.pdf
