# Supplementary material for: Simulations of 7 Be and 10 Be with the GEOS-Chem global model v14.0.2 using state-of-the-art production rates
Source: Copernicus journal article supplement (doi:10.5194/gmd-16-7037-2023), 2023-12-04
Supplement: Supplementary file 3 [file gmd-16-7037-2023-supplement.zip › TableS1_S4.xlsx]

## Sheet: TableS1
		Table S1. Overview of the simulations in this study. All simulations are spun up for six years (2002-2007).
		Simulations	Production models	Simulation periods	Description of the production models	Model resolution
		Scenario I (standard simulation)	P16spa	2008-2018	- Integral of the yield function from simulation of atmospheric cascade (Poluianov et al., 2016), and the energy spectrum of cosmic rays above the geomagnetic cutoff rigidity (Herbst et al., 2017) - The cut-off rigidity is taken from the Copeland (2018) which includes both dipole and non-dipole contributions	- Horizontal resolution: 4°×5° - Vertical resolution: 72 levels
		Scenario II	P16		Same as P16spa, but the cut-off rigidity is simply calculated as a function of the geomagnetic latitude and geomagnetic dipole moment
		Scenario III	LP67 (Default production rate in GEOS-Chem)		- Empirical parameterization of the production rate from Lal and Peters (1967) - Production rate is only for the year 1958 and does not consider the influence of solar modulation (e.g., 11-year solar cycle) - 10Be is calculated simply by scaling the 7Be production rate with a ratio of 0.55

## Sheet: TableS2
Table S2. 10Be measurements from surface air samples
Locations	Covering period	Resolution	Latitude	Longitude	10Be (104 atoms/m3)	Dust 10Be contribution (%)	References
Chengdu, China	Oct. 2020 - Sep. 2021	Daily	30.94°N	103.67°E	3.52	0.22	Liu et al. (2022)
Southern Sweden	1983 - 2000	Weekly	56.08°N	13.23°E	3.092	NA	Aldahan et al. (2008)
Northern, Sweden	1983 - 2000	Weekly	67.84°N	20.34°E	2.508	NA	Aldahan et al. (2008)
Tokyo, Japan	2002 - 2014	Weekly	35.7°N	139.6°E	5.83	NA	Yamagata et al. (2019)
Dazaifu, Japan	1998 - 2002	Weekly	33.5°N	130.5°E	4.78	NA	Yamagata et al. (2019)
Seville, Spain	Dec. 2012 - Dec. 2013	Weekly	37.35°N	5.99°W	4.52832	0.1	Padilla et al. (2019)
Cáceres, Spain	Nov. 2004 - Mar. 2007	Monthly	39.51°N	6.34°W	4.61	NA	Rodriguesz-Perulero et al. (2019)
Lhasa, China	Aug. 2006 - Jul . 2007	(bi)Weekly	29.63°N	91.02°E	14.14	NA	Huang et al. (2010)
Mexico city, Mexico	Jan. - Mar. & Dec. 2016	(bi)Weekly	19.4°N	99.1°W	3.11	0.05	Méndez-García et al. (2022)
Alert, Canada	Sep. 1990 - Sep. 1991	Weekly	82.5°N	62.3°W	2.2	Polar region, considering little dust influence	Dibb et al. (1994)
Neumayer, Antarctica	1984 - 2008	Weekly to Annual	70.65°S	8.25°W	4.6		Elsasser et al. (2011)

## Sheet: TableS3
Table S3. 10Be measurements from precipitation samples and ice core samples.
Location	Covering period	Resolution	Latitude	Longitude	Annual precipitation/accumulation (mm/y)	10Be annual deposition (106 atoms/cm2/yr)	Dust 10Be contribution (%)	References
Gracefield, New Zealand	Oct. 1996 - Nov. 1998	Monthly	41.25°S	174.92°E	NA	2.75	0.1	Graham et al. (2003)
Leigh, New Zealand	Oct. 1997 - Sep. 1998	Monthly	36.28°S	174.80°E	NA	2.63	0.11	Graham et al. (2003)
Dunedin, New Zealand	Mar. 1997 - Sep. 1998	Monthly	45.87°S	170.50°E	NA	1.85	0.08	Graham et al. (2003)
Berkeley, Calif, USA	Dec. 1980 - Dec. 1981	Annually	37.87°N	122.29°W	589	1.38	0.21	Monaghan et al. (1986)
Salt Lake City, Utah, USA	Dec. 1980 - Dec. 1981	Annually	40.78°N	111.98°W	439	1.63	0.29	Monaghan et al. (1986)
College Station, Texas, USA	Oct. 1980 - Nov. 1981	Annually	30.59°N	96.30°W	996	2.4	0.26	Monaghan et al. (1986)
Argonne, USA	Sep. 1980 - Sep. 1981	Annually	41.71°N	87.98°W	874	2.47	0.35	Monaghan et al. (1986)
Miami, Fla, USA	Aug. 1980 - Aug. 1981	Annually	25.78°N	80.21°W	1518	1.77	0.26	Monaghan et al. (1986)
New Haven, Conn, USA	Dec. 1980 - Jan. 1982	Annually	41.30°N	72.92°W	1169	3.12	0.2	Monaghan et al. (1986)
Jungfraujoch, Switzerland	Jan. 1998 - Dec. 2004	Monthly	46.32°N	7.59°E	1277.5	2.55442	NA	Heikkila et al. (2008a)
Dubendorf, Switzerland	Jan. 1998 - Nov. 2004	Monthly	47.25°N	8.27°E	949	2.55442	NA	Heikkila et al. (2008a)
Delhi, India	Jun. 1979 - Jul. 1981	Annually	28.60°N	77.20°E	550	2.4	NA	Somayajulu et al. (1984)
Agra, India	Jul. 1979 - Jul. 1981	Annually	27.20°N	78.03°E	470	1.7	NA	Somayajulu et al. (1984)
Ahmedabad, India	Jun. 1979 - Jul. 1981	Annually	23.10°N	72.63°E	690	0.8	NA	Somayajulu et al. (1984)
Trivandrum, India	Jul. 1979 - Aug. 1980	Annually	8.50°N	76.95°E	1620	1.4	NA	Somayajulu et al. (1984)
Paris, France	Apr. 1978 - Apr. 1979	Monthly	48.80°N	2.35°E	NA	1.73448	NA	Raisbeck et al. (1979)
Kikai Island, Japan	Jun. 2000 - Jun. 2002	Sub-annually	28.29°N	130.00°E	2120	2.8	NA	Maejima et al. (2005)
NEEM, Greenland	1980 - 2000	Sub-annually	77.45°N	51.06°W	218.2	0.197	Polar region, considering little dust influence	Zheng et al. (2020)
EGRIP, Greenland	1980 - 2000	Annually	75.62°N	35.98°W	129.1	0.15		Zheng et al. (2023)
NGRIP, Greenland	1980 - 2000	Annually	75.17°N	42.50°W	190	0.23		Berggren et al. (2009)
Das2, Greenland	1980 - 2000	Annually	67.52°N	36.05°W	905	0.49		Pedro et al. (2012)
Renland, Greenland	1980 - 1988	Annually	71.30°N	26.72°W	520	0.45		Aldahan et al. (1998)
GRIP, Greenland	1986 - 1991	Sub-annually	77.45°N	51.06°W	240	0.278		Heikkila et al. (2008c)
DSS, Antarctica	1980 - 2000	Annually	66.77°S	112.81°E	750	0.34		Pedro et al. (2012)
Vostok, Antarctica	1980 - 2000	Annually	78.00°S	106.00°E	23	0.17756		Baroni et al. (2011)
Dome C, Antarctica	1985 - 2000	Annually	74.65°S	124.17°E	32	0.1744		Baroni et al. (2011)
DML, Antarctica	1980 - 1988	Annually	73.60°S	12.43°W	240	0.3		Aldahan et al. (1998)
Dome C, Antarctica	Multiply years (surface firn)	NA	75.10°S	123.30°E	25	0.1415		Auer et al. (2009)
Neumayer, Antarctica	Multiply years (surface firn)	NA	70.65°S	8.25°W	360	0.4482		Auer et al. (2009)
Kohnen, Antarctica	Multiply years (surface firn)	NA	75.00°S	0.07°E	64	0.19328		Auer et al. (2009)

## Sheet: Table S4
		Table S4. 7Be and 10Be production rates averaged over the troposphere, stratosphere, stratosphere+troposphere in the production rates of LP67, P16, and P16spa (g/day). See text for details. For consistency, we use the average tropopause data spanning the period 2008-2018 to classify the tropospheric and stratospheric components.
				7Be				10Be
				LP67	P16 (1958)	P16 (2008-2018)	P16spa (2008-2018)	LP67	P16 (1958)	P16 (2008-2018)	P16spa (2008-2018)
		Global	Troposphere	0.13	0.094	0.132	0.131	0.104	0.067	0.095	0.095
			Stratosphere	0.272	0.158	0.276	0.272	0.216	0.093	0.163	0.161
			Stratosphere + Troposphere	0.402	0.252	0.408	0.403	0.32	0.16	0.258	0.256
		Northern Hemisphere	Stratosphere + Troposphere	0.201	0.126	0.204	0.191	0.16	0.08	0.129	0.121
		Southern Hemisphere	Stratosphere + Troposphere	0.201	0.126	0.204	0.212	0.16	0.08	0.129	0.135
